# Supplementary material for: A Systematic Review of Diet Quality Index and Obesity among Chinese Adults
Source: MDPI journal article supplement (doi:10.3390/nu13103555), 2021-10-11
Supplement: s1 [file s1]

**Supplementary Table S1.** The quality score of each study.

| Reference                | Quality of Study |
|--------------------------|------------------|
| Stookey et al., 2000     | 7                |
| Gao et al., 2008         | 11               |
| Xu et al., 2015          | 7                |
| Neelakantan et al., 2016 | 7                |
| Tian et al., 2016        | 7                |
| Hunag et al., 2017       | 7                |
| Wang et al., 2017        | 9                |
| Yuan et al., 2017        | 6                |
| Zang et al., 2017        | 7                |
| Cheung et al., 2018      | 8                |
| Wang et al., 2018        | 7                |
| Whitton et al., 2018     | 7                |
| Zhang et al., 2018       | 6                |
| Zhao et al., 2018        | 7                |
| Chou et al., 2019        | 6                |
| Jia et al., 2020         | 7                |
| Nguyen et al., 2020      | 6                |
| Wang et al., 2020        | 6                |
| Zhou et al., 2020        | 7                |
| Liu et al., 2021         | 11               |
